# Supplementary material for: HIV-Specific Antibody-Dependent Cellular Cytotoxicity (ADCC) -Mediating Antibodies Decline while NK Cell Function Increases during Antiretroviral Therapy (ART)
Source: PubMed Central journal article supplement (PMC4692281; doi:10.1371/journal.pone.0145249), 2015-12-22

# Supporting Information 1

ARTbefore sero conversion,  
n=8

ART at CD4<sup>+</sup> T cell count  
>350, n=9

ART at CD4<sup>+</sup> T cell count  
<350, n=18

ART-naïve,  
n=18

HIV-negative,  
n=12

**A**

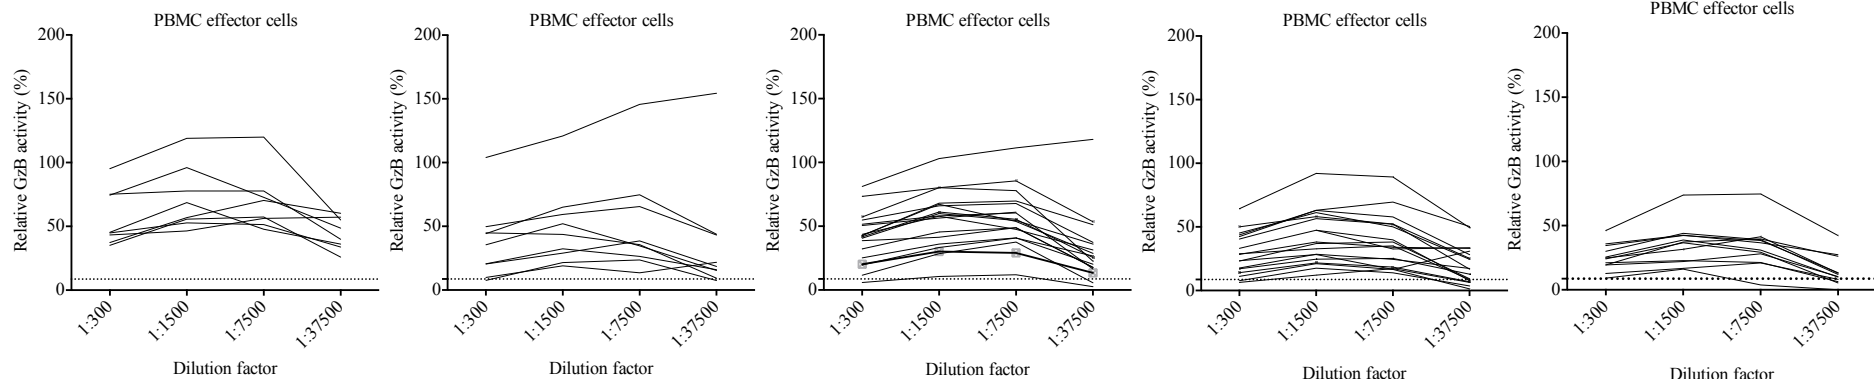

**B**

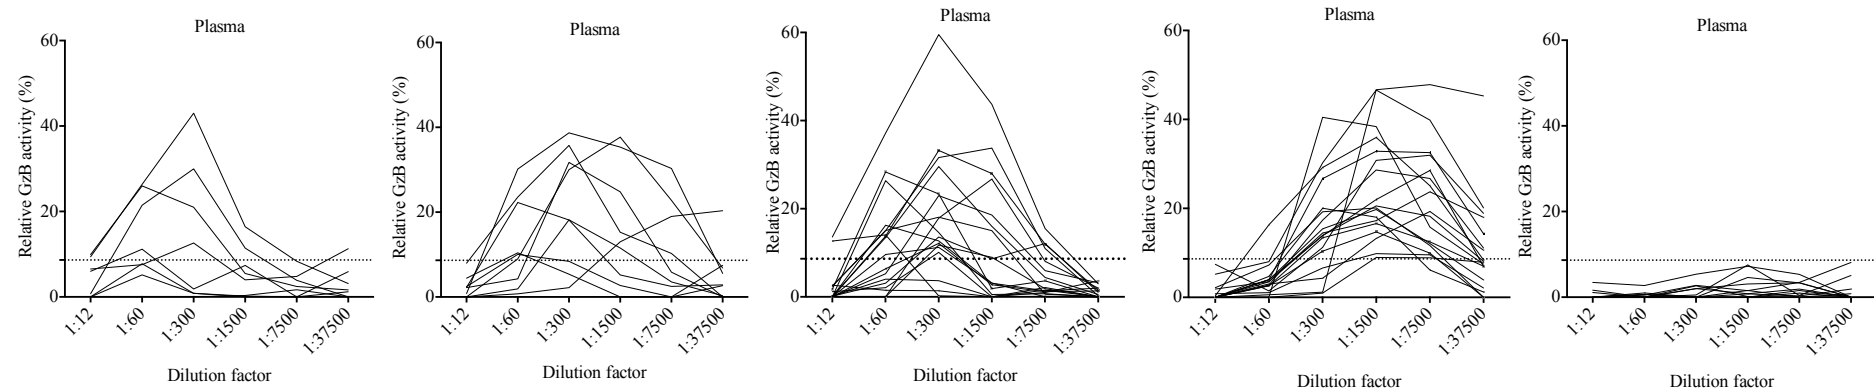

**C**

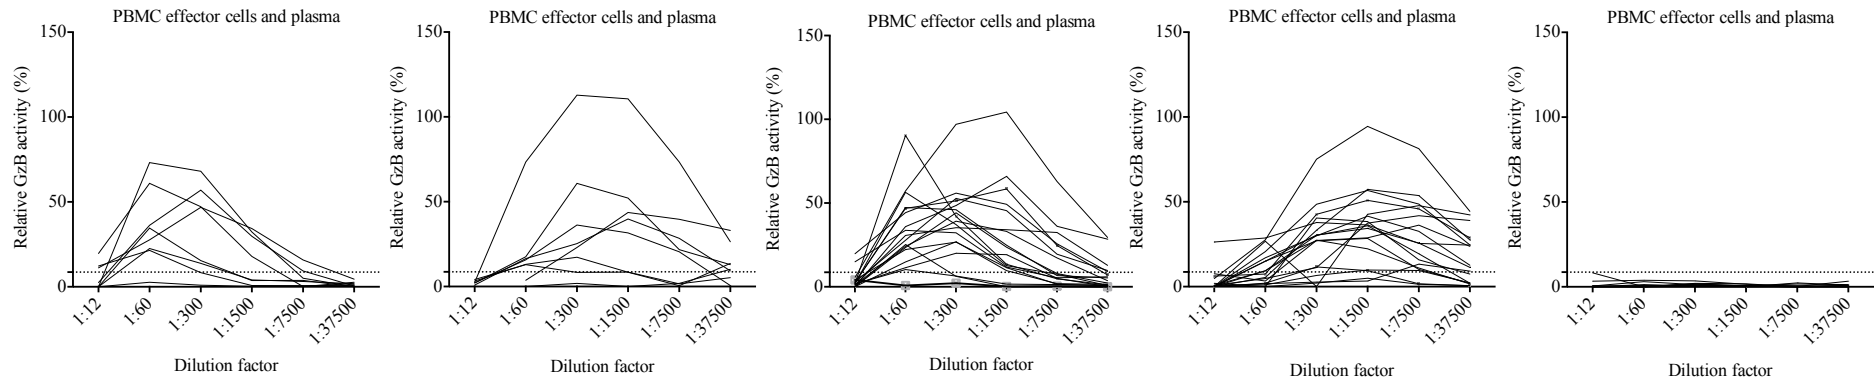

Supplement: pone.0145249.s001.pdf [file pone.0145249.s001.pdf]
