# Supplementary material for: HIV-Specific Antibody-Dependent Cellular Cytotoxicity (ADCC) -Mediating Antibodies Decline while NK Cell Function Increases during Antiretroviral Therapy (ART)
Source: PubMed Central journal article supplement (PMC4692281; doi:10.1371/journal.pone.0145249), 2015-12-22

# Supporting Information 3

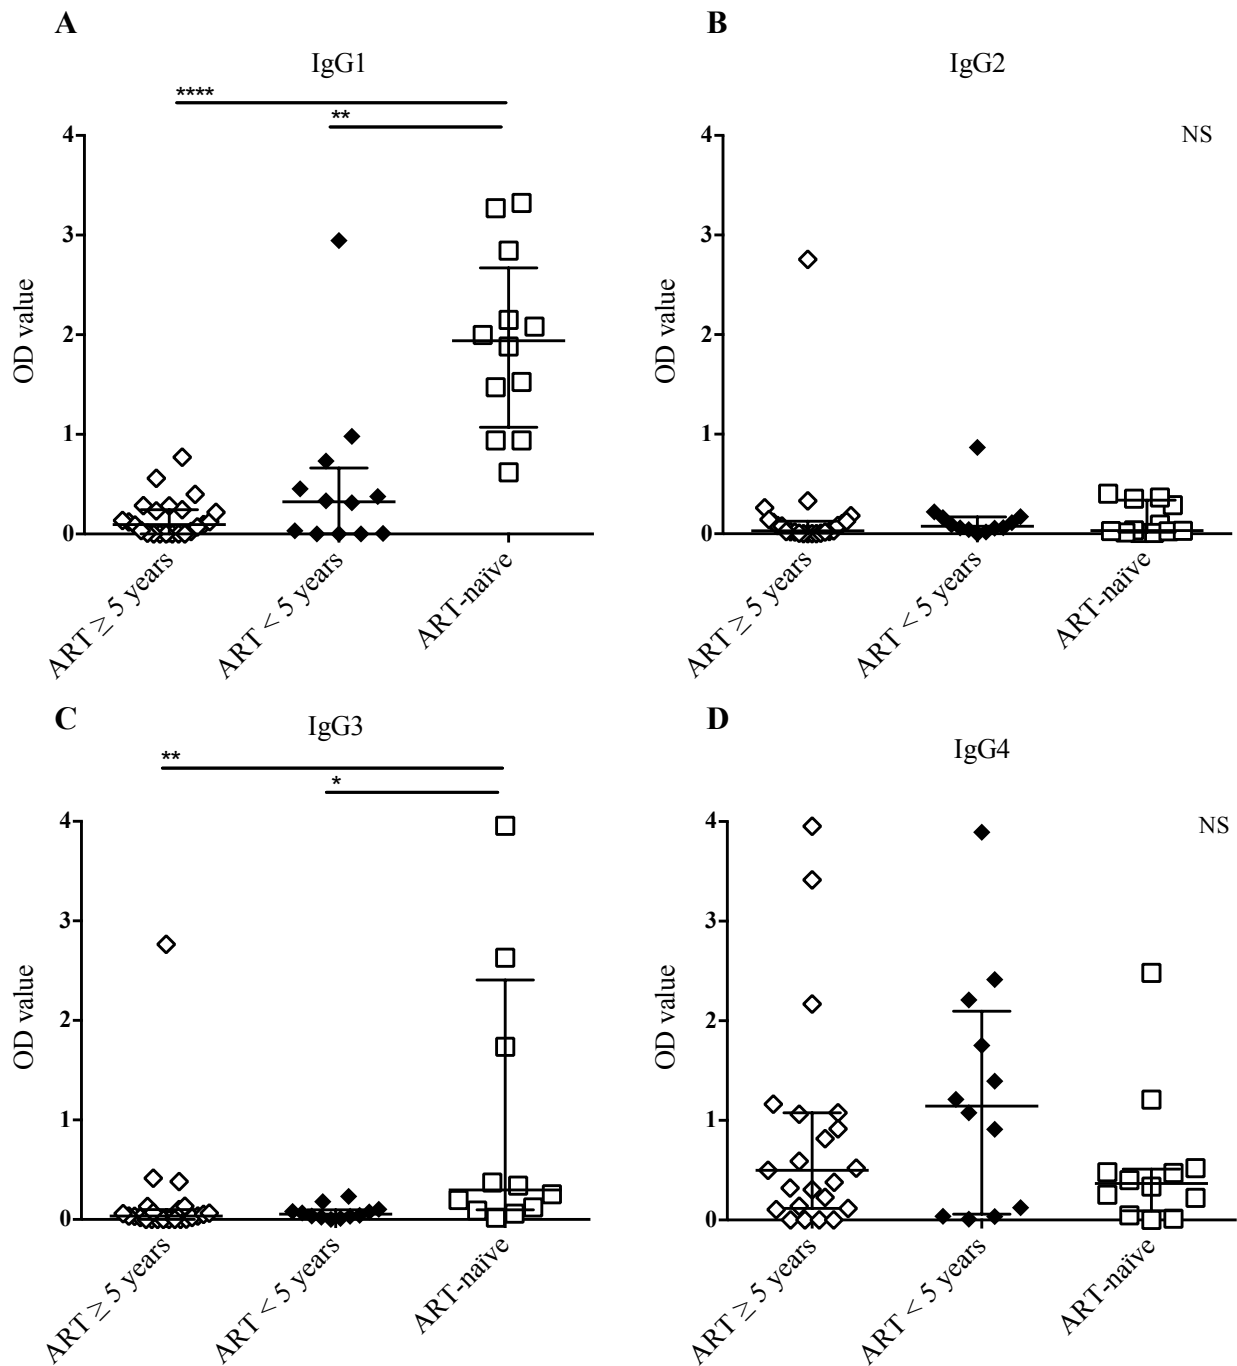

Supplement: pone.0145249.s003.pdf [file pone.0145249.s003.pdf]
